# Supplementary material for: Structures of Dimer-of-Dimers Type Defect Cubane Tetranuclear Copper(II) Complexes with Novel Dinucleating Ligands
Source: MDPI journal article supplement (doi:10.3390/molecules27020576), 2022-01-17
Supplement: s1 [file s1]

## Supplementary Materials

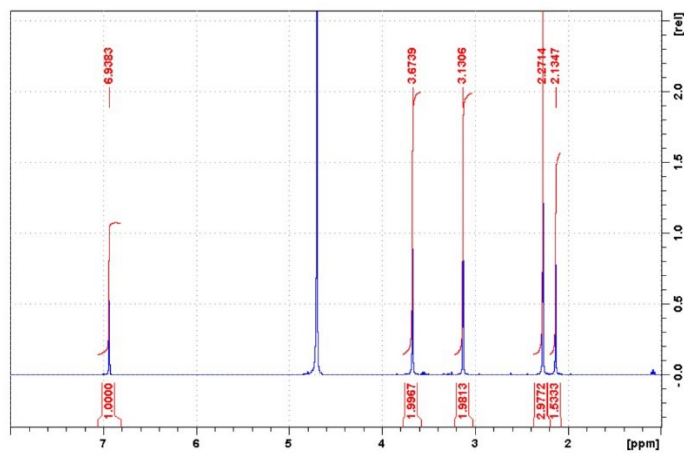

Figure S1. <sup>1</sup>H NMR of Na<sub>2</sub>H(*sym*-cmp)·3H<sub>2</sub>O.

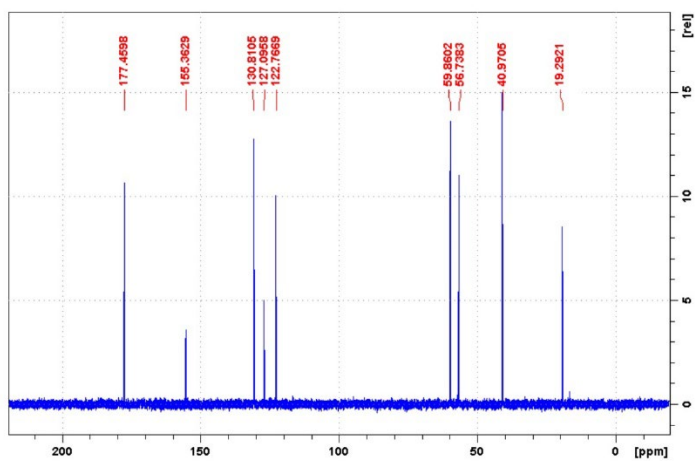

Figure S2. <sup>13</sup>C NMR of Na<sub>2</sub>H(*sym*-cmp)·3H<sub>2</sub>O.

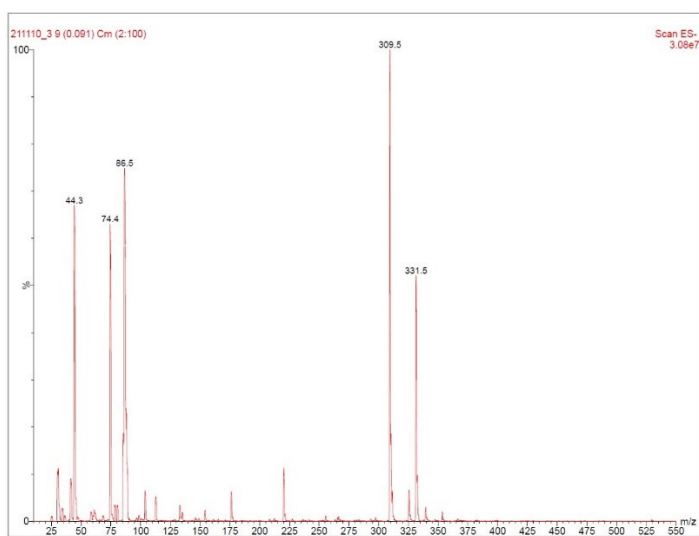

**Figure S3.** ESI-mass spectra of  $\text{Na}_2\text{H}(\text{sym-cmp}) \cdot 3\text{H}_2\text{O}$ .

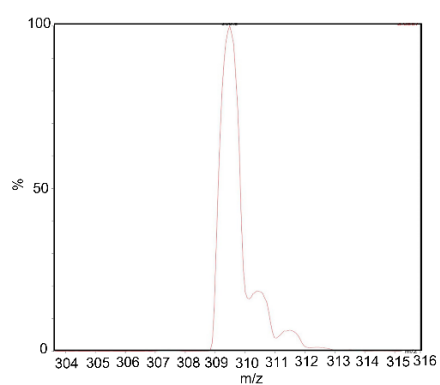

**(a)**

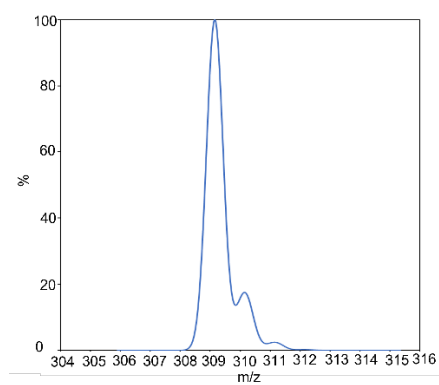

**(b)**

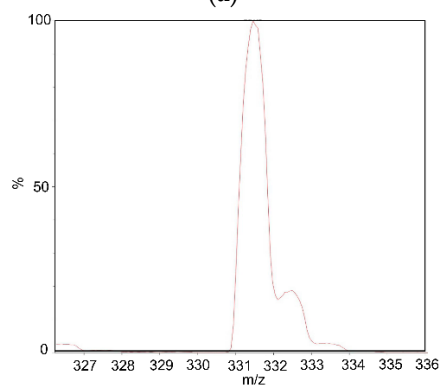

**(c)**

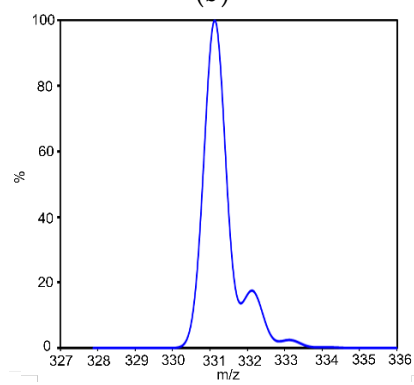

**(d)**

**Figure S4.** Isotope pattern for  $\text{Na}_2\text{H}(\text{sym-cmp}) \cdot 3\text{H}_2\text{O}$ : (a) observed for  $m/z$  309; (b) theoretical for  $m/z$  309; (c) observed for  $m/z$  331; (d) theoretical for  $m/z$  331.

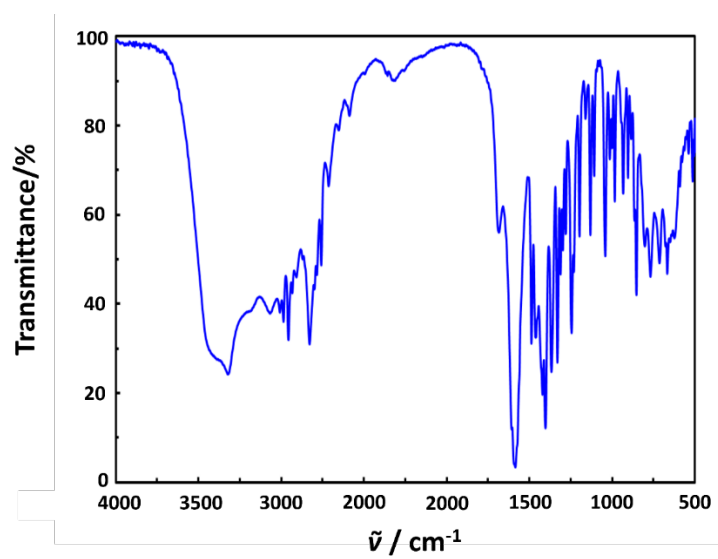

Figure S5. IR spectra of  $\text{Na}_2\text{H}(\text{sym-cmp}) \cdot 3\text{H}_2\text{O}$ .

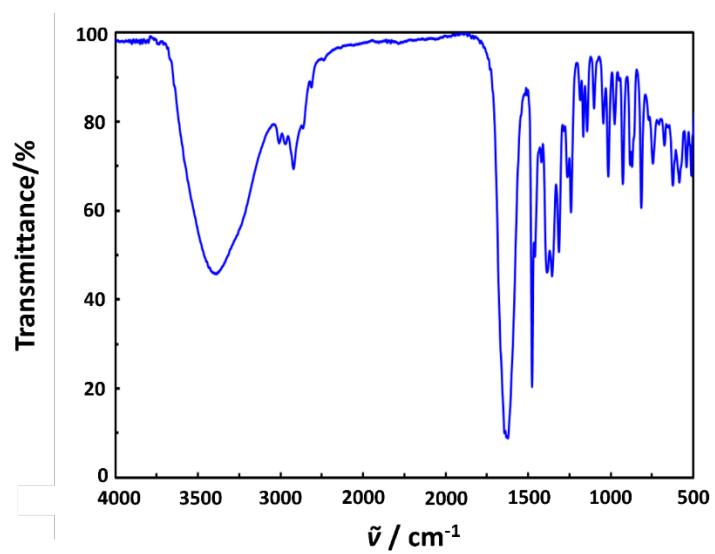

Figure S6. IR spectra of 1.
